# Supplementary material for: RETRACTED: Molecular Structure and Dimeric Organization of the Notch Extracellular Domain as Revealed by Electron Microscopy
Source: PLOS journal article supplement (doi:10.1371/journal.pone.0010532), 2010-05-07
Supplement: S1 (10.1371/journal.pone.0010532.s001) [file journal.pone.0010532.s001]

| NECD reconstructions | Number of classes combined | Particles used in reconstructions  (tilted / untilted) | Number of voxels (A3) contoured at 6 | Molecular weight (Da) contoured  at 6 |
| --- | --- | --- | --- | --- |
| Drosophila map 1 | 2 | 1406 / 120 | 3443 | 369,233 |
| Drosophila map 2 | 2 | 1346 / 136 | 3703 | 397,135 |
| Drosophila map 3 | 3 | 1625 / 151 | 3681 | 394,669 |
| Human map 1 | 3 | 1552 / 156 | 3427 | 367,481 |
| Human map 2 | 2 | 983 / 80 | 3693 | 396,893 |
| Human map 3 | 3 | 1387 / 127 | 3675 | 394,556 |
